# Supplementary material for: Preoperative Ultrasound for the Prediction of Postinduction Hypotension: A Systematic Review and Meta-Analysis
Source: MDPI journal article supplement (doi:10.3390/jpm14050452), 2024-04-25
Supplement: s1 [file s1]

Supplementary Materials

Figure S1A: Forest plot for sensitivity and specificity of IVC-CI for diagnosis of PIH.

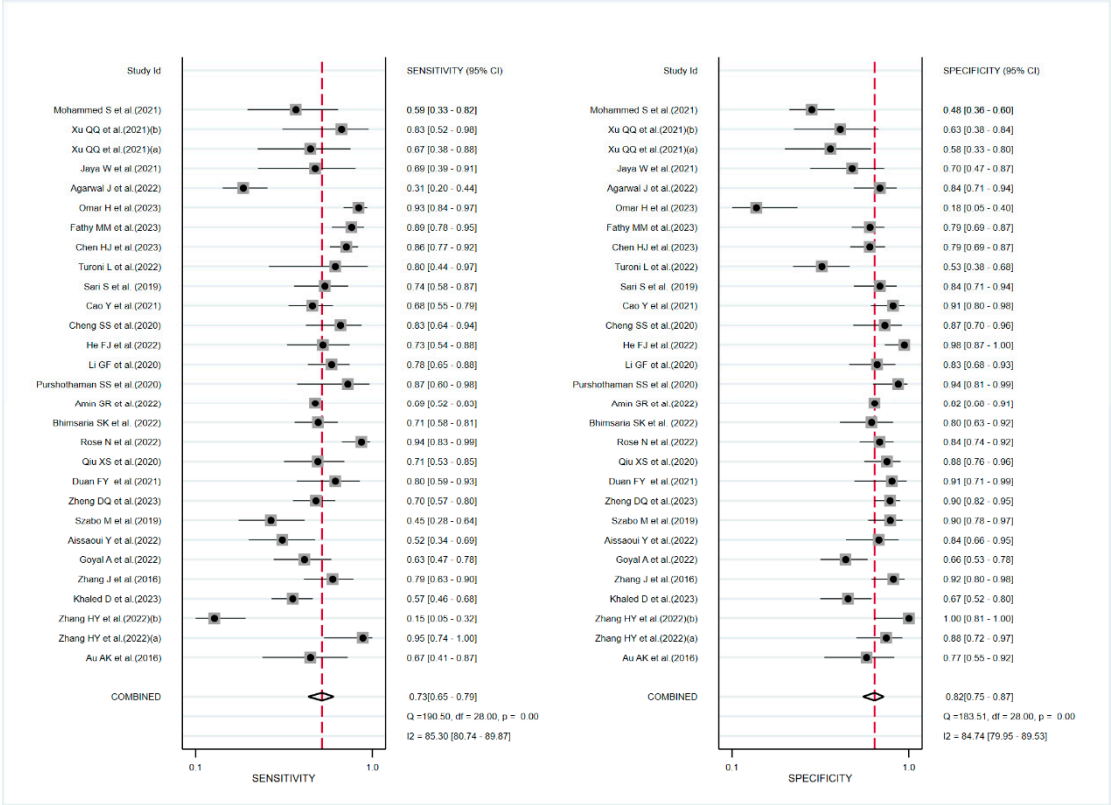

Figure S1B: Forest plot for sensitivity and specificity of DIVCmax for diagnosis of PIH.

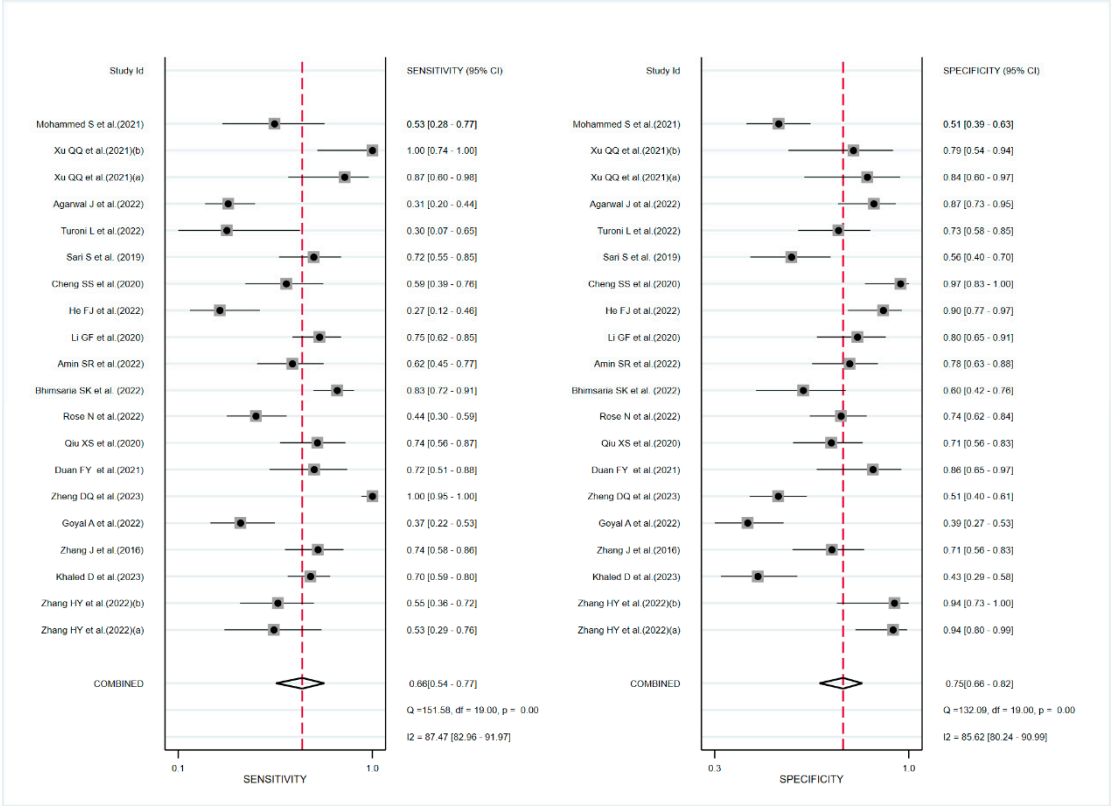

Figure S1C: Forest plot for sensitivity and specificity of DIVCmin for diagnosis of PIH.

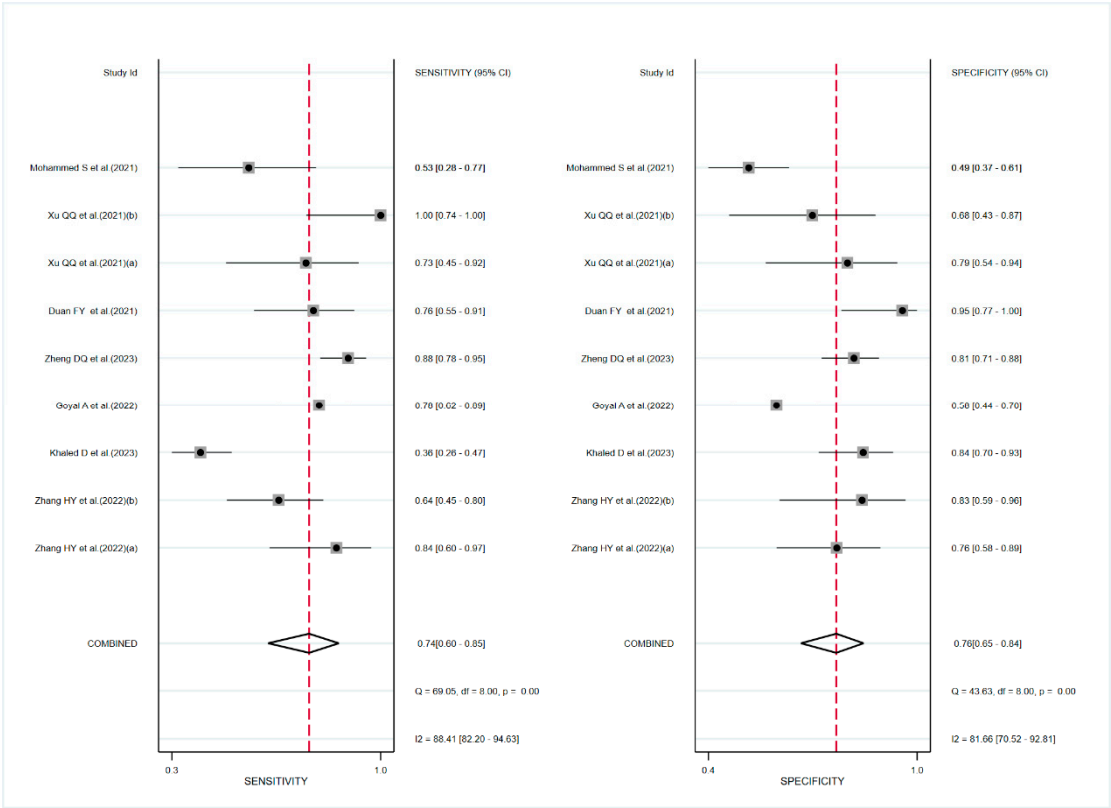

Figure S1D: Forest plot for sensitivity and specificity of carotid artery FTc for diagnosis of PIH.

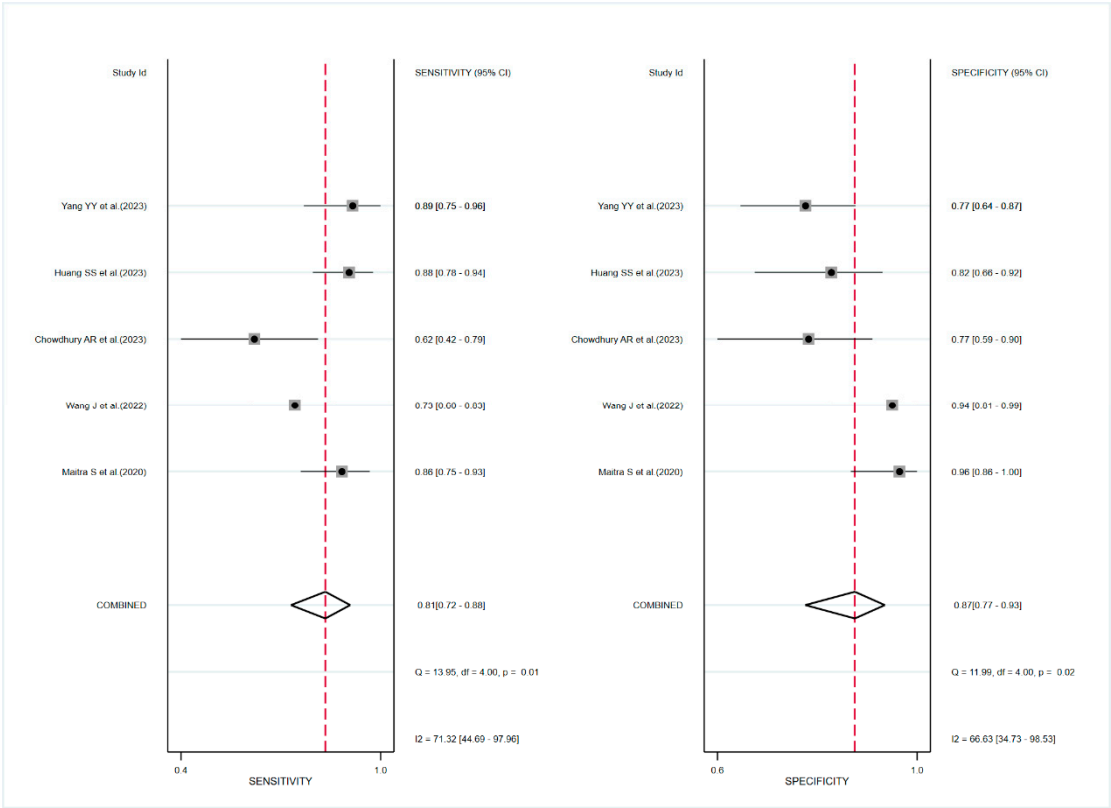

Figure S2A: Forest plot for the mean difference of IVC-CI between patients with PIH and without PIH.

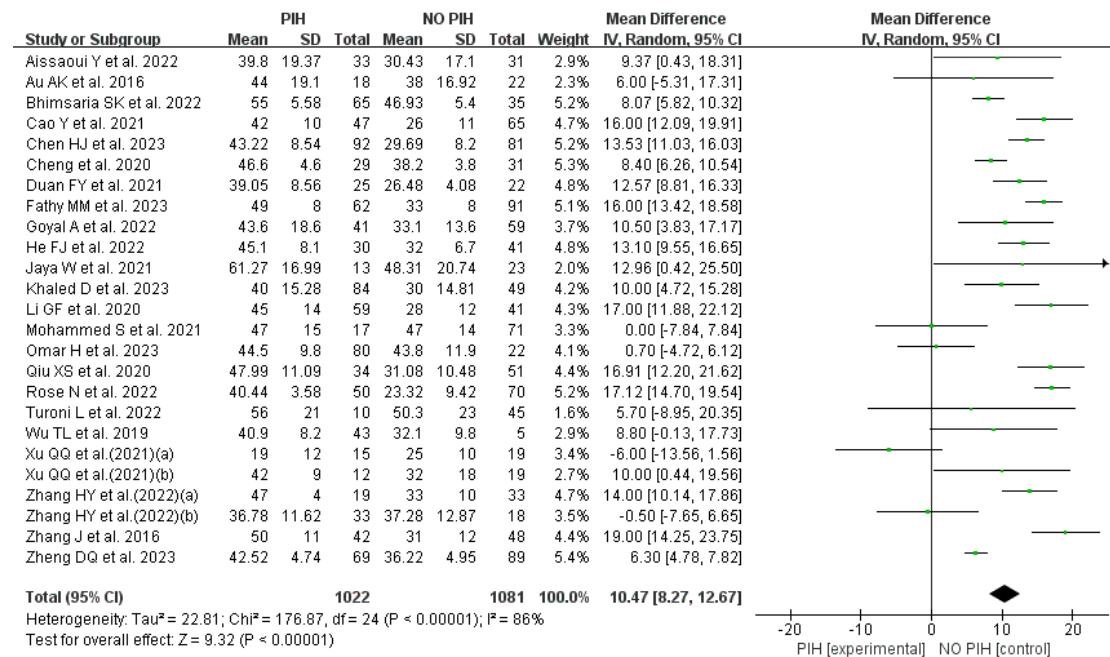

Figure S2B: Forest plot for the mean difference of DIVCmax between patients with PIH and without PIH.

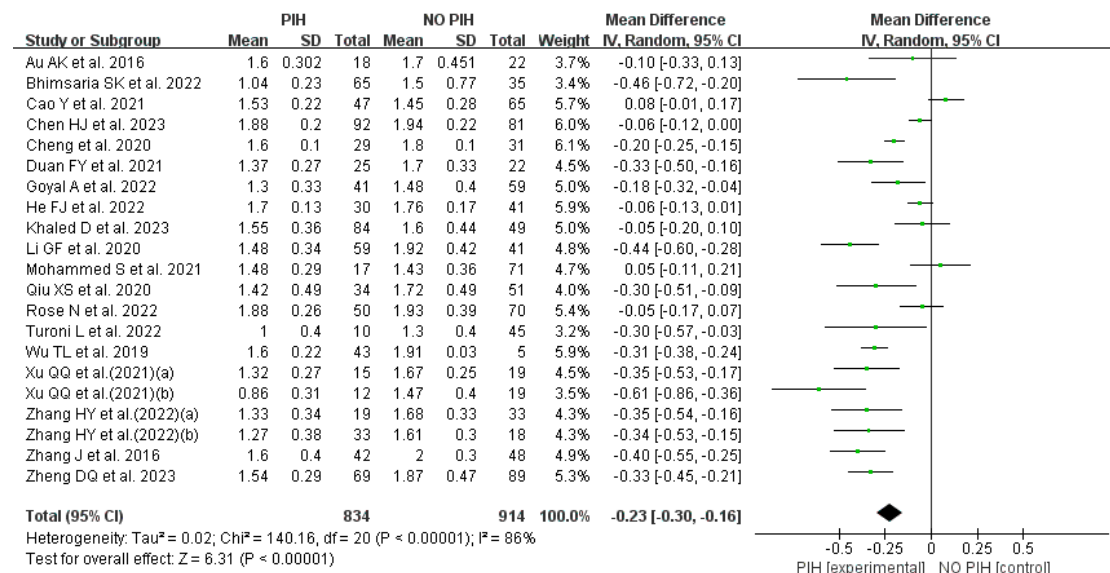

Figure S2C: Forest plot for the mean difference of DIVCmin between patients with PIH and without PIH.

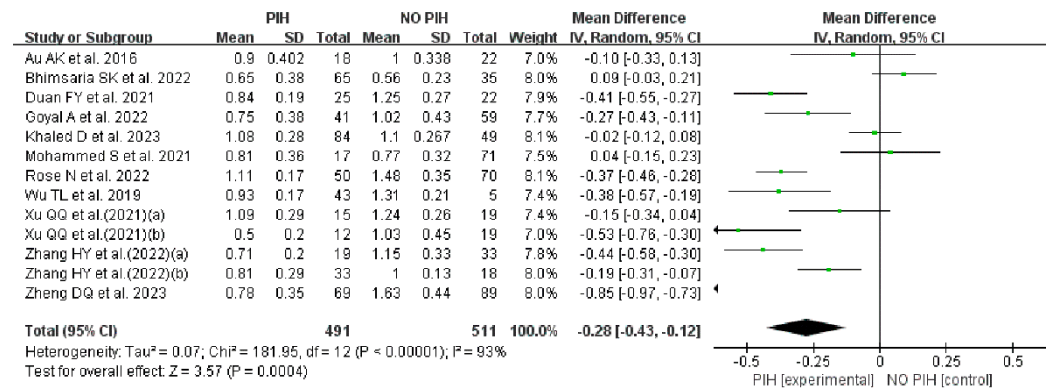

Figure S2D: Forest plot for the mean difference of carotid artery FTc between patients with PIH and without PIH.

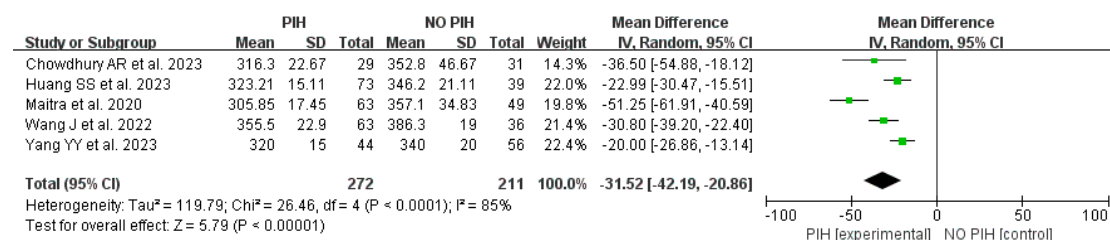

Figure S3A: Fagan’s nomogram for IVC-CI.

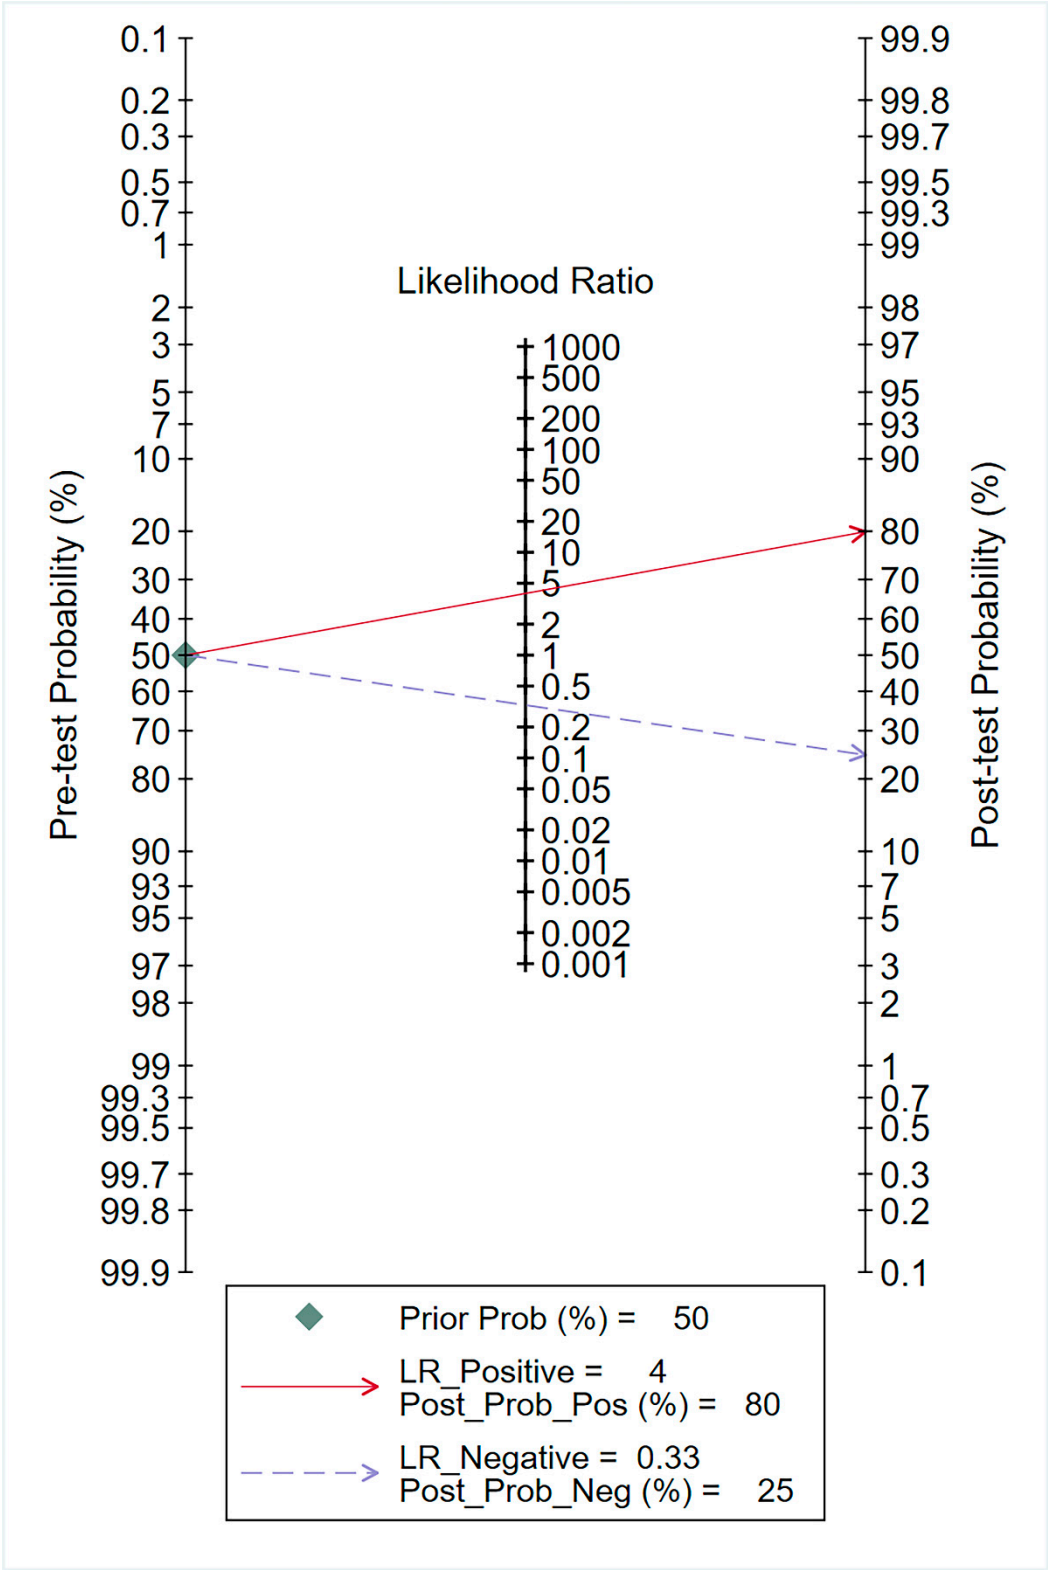

Figure S3B: Fagan’s nomogram for DIVCmax.

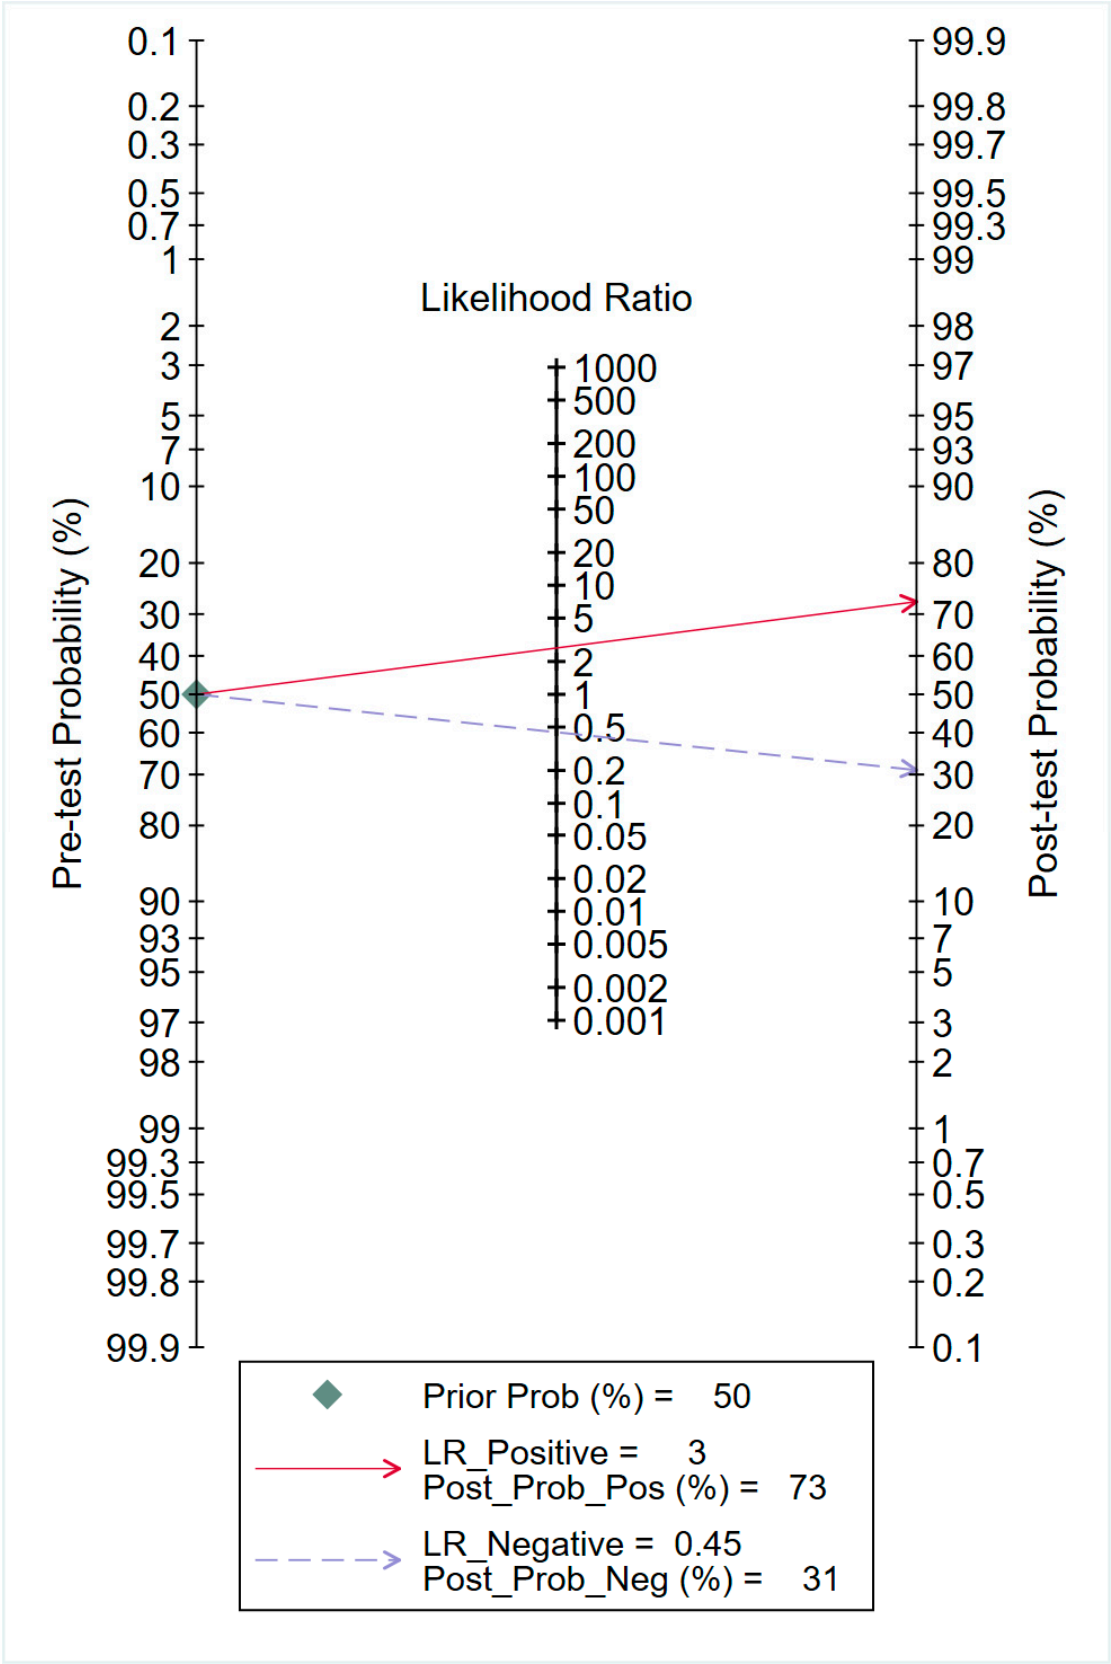



Figure S3C: Fagan’s nomogram for DIVCmin.

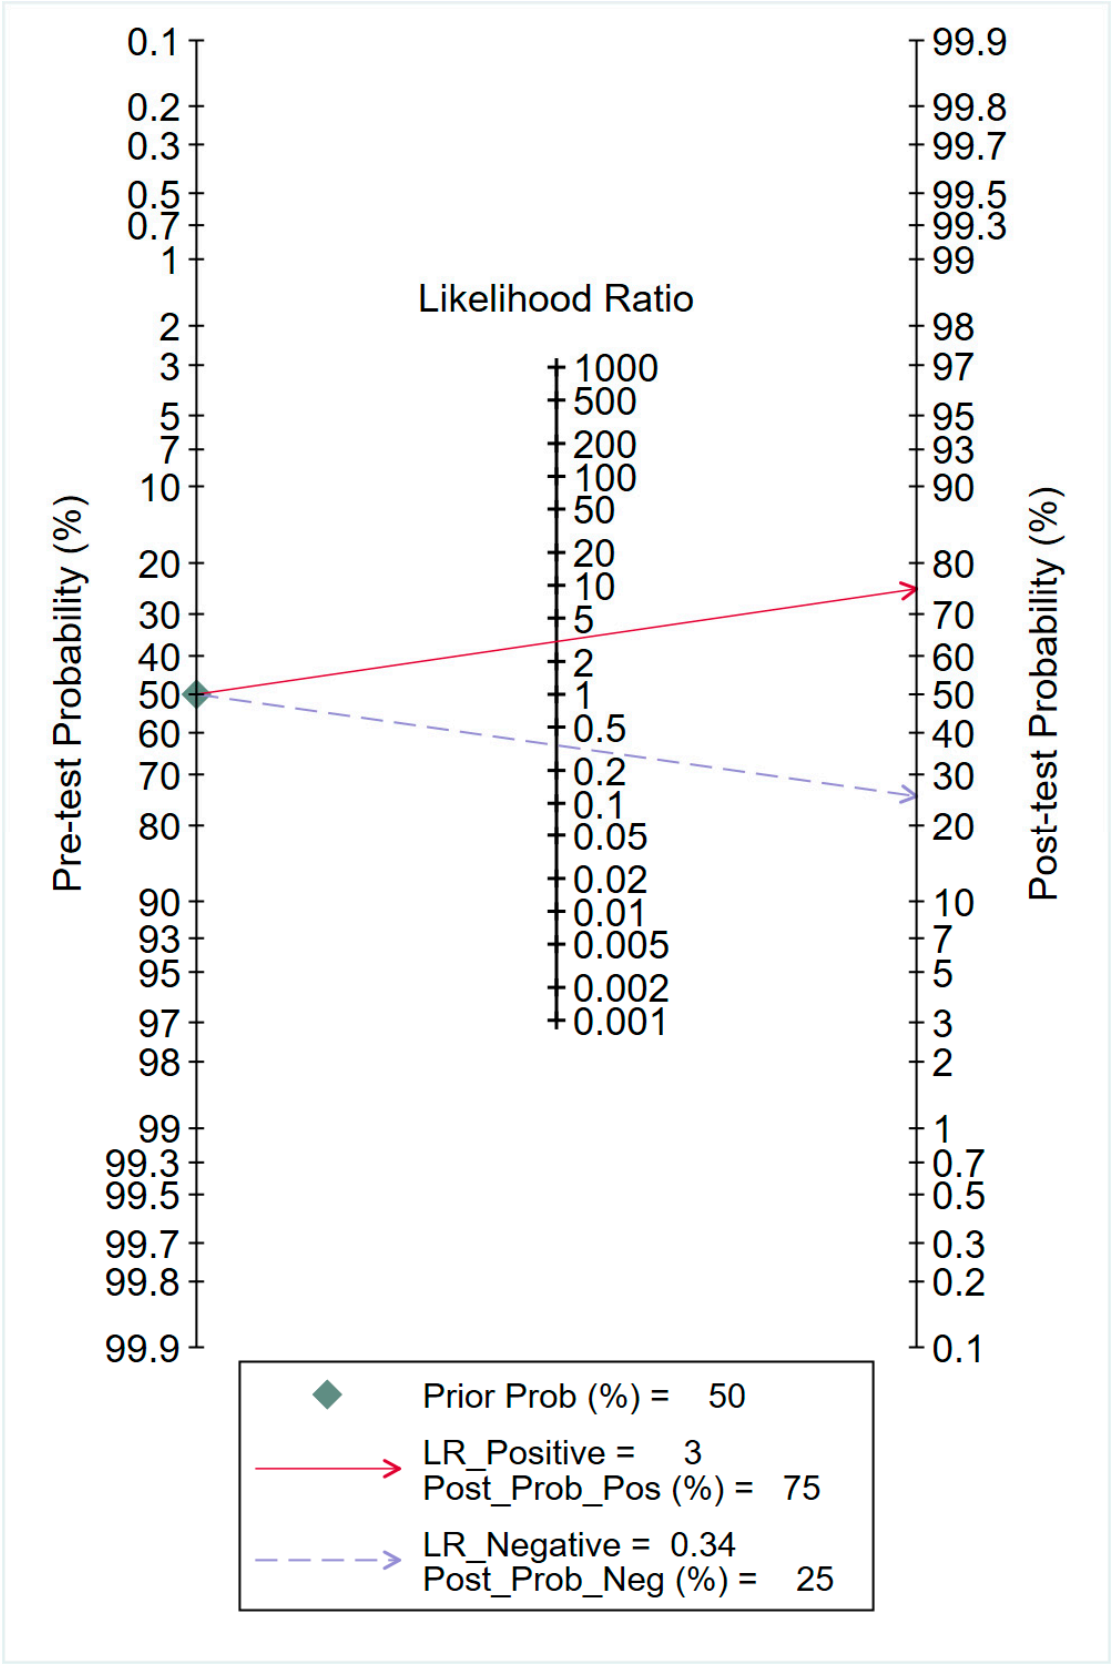

Figure S3D: Fagan’s nomogram for carotid artery FTc.

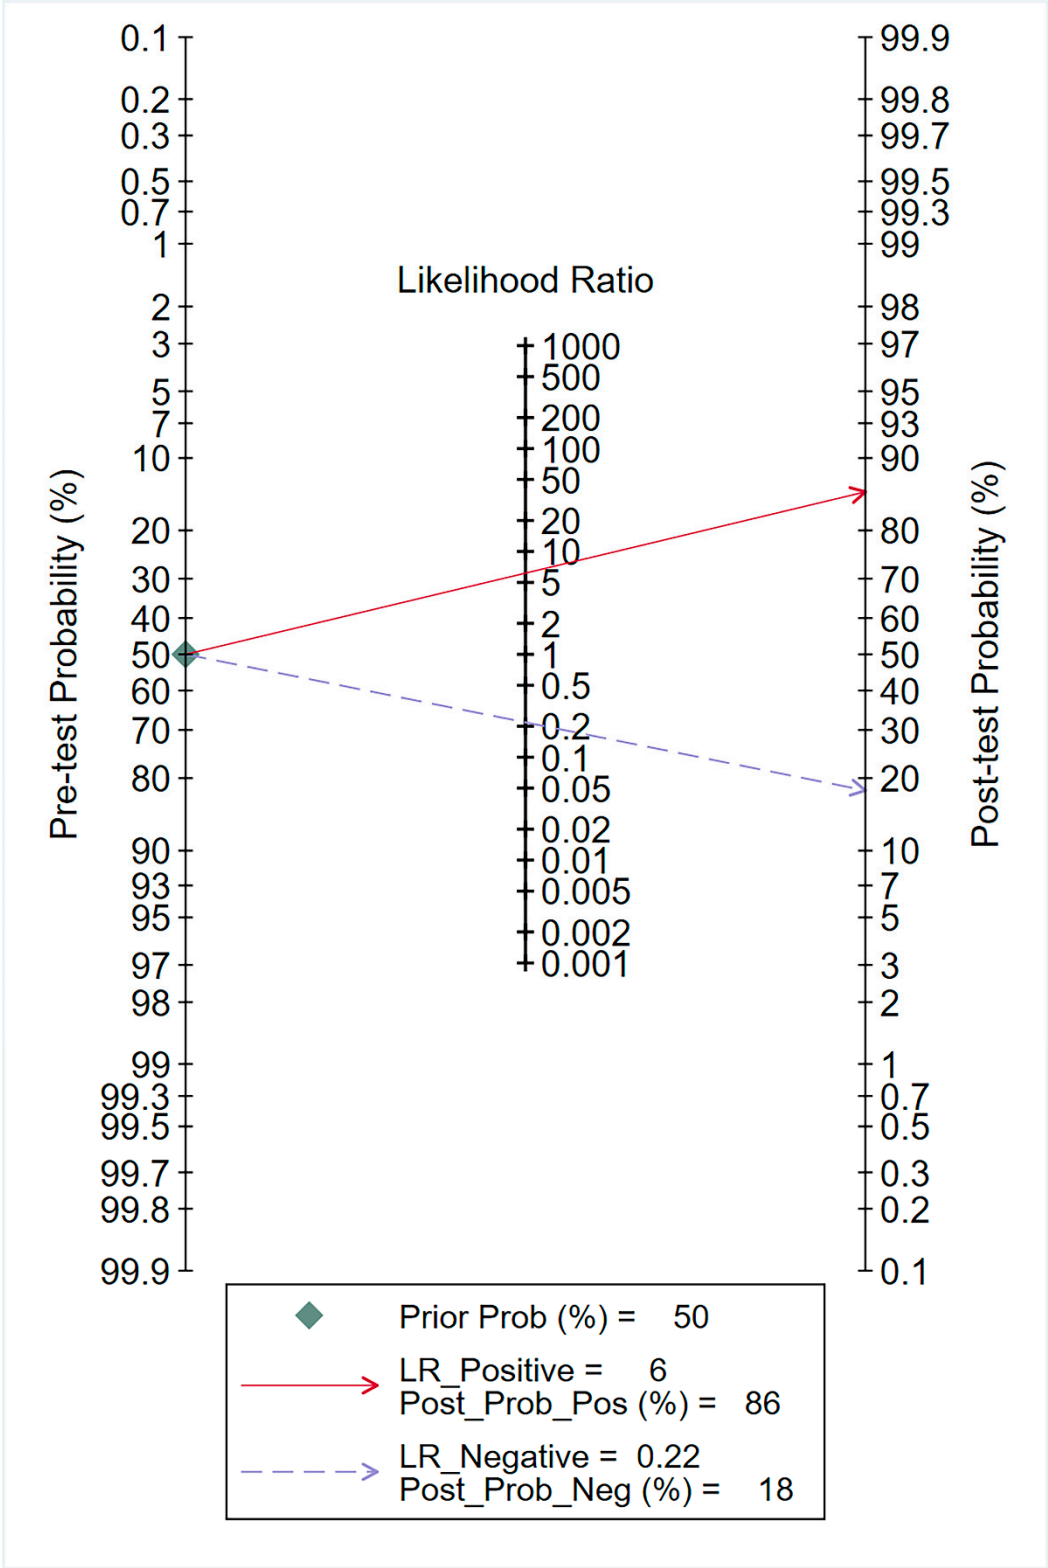

Figure S4A: Meta-regression for IVC-CI.

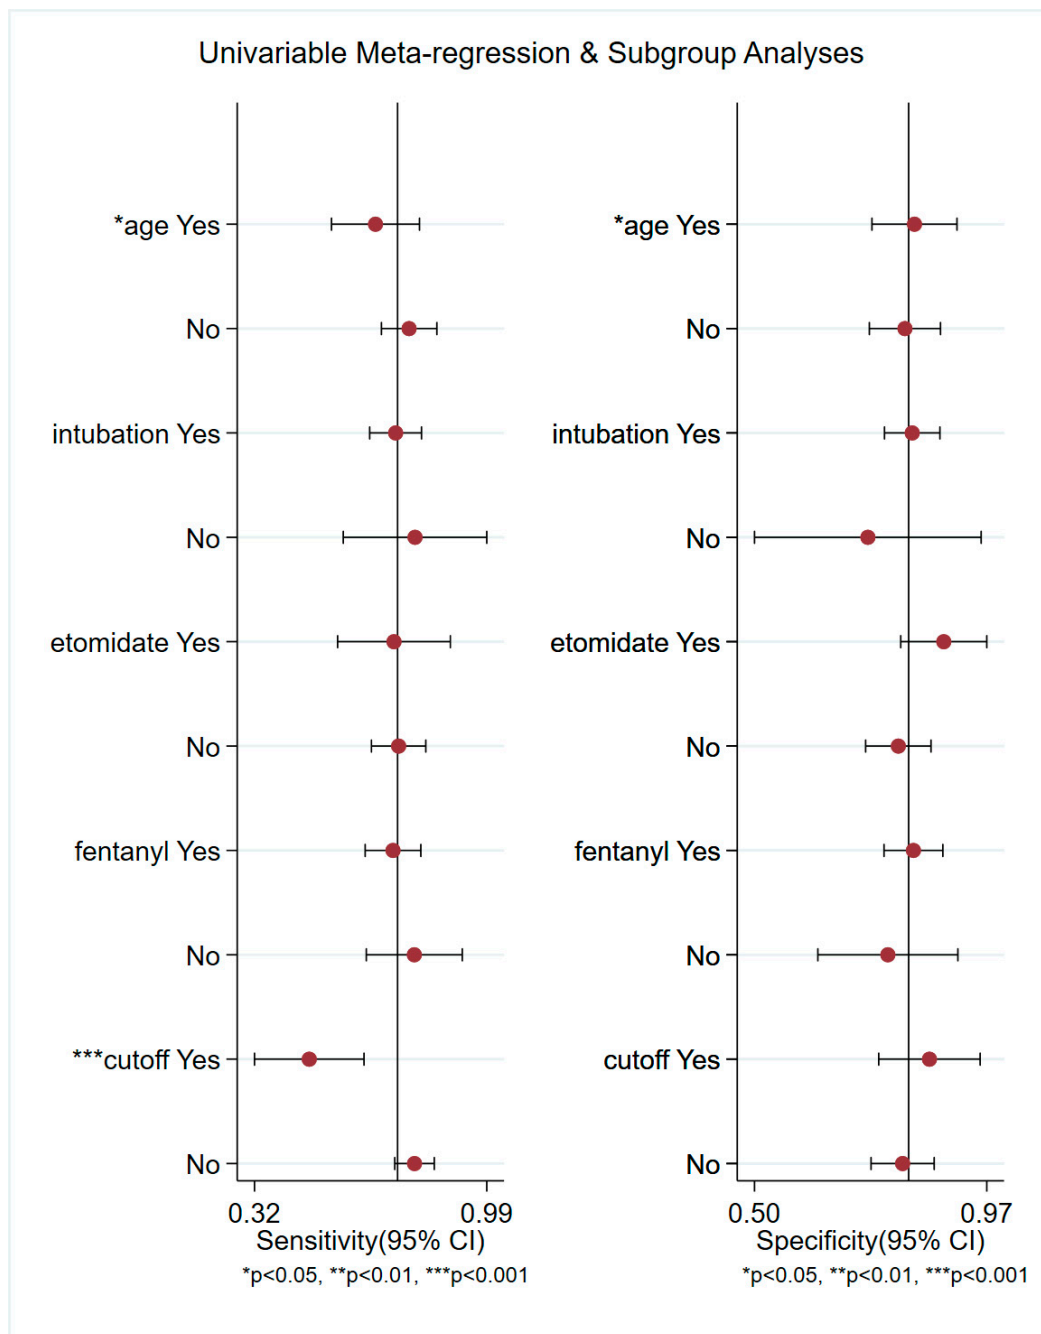

Notes: age: Yes = age > 60 years, No = other; etomidate: Yes = using etomidate for anesthesia induction, No = other; fentanyl: Yes = using fentanyl for anesthesia induction, No = other; cutoff: Yes = IVC-CI > 50%, No = other.

Figure S4B: Meta-regression for DIVCmax.

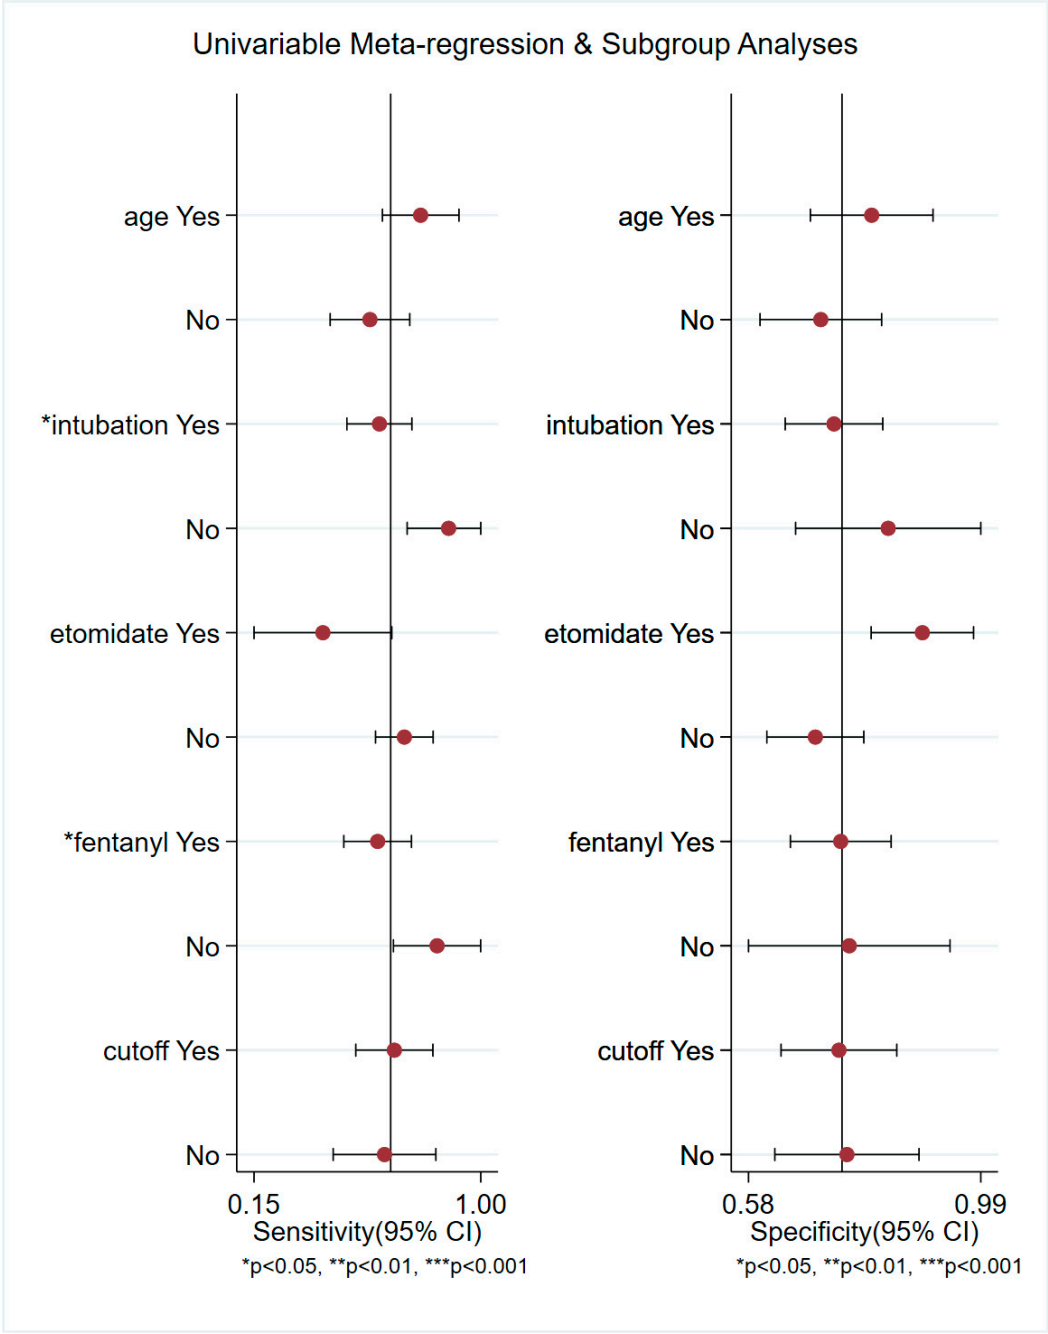

Notes: Yes = age > 60 years, No = other; etomidate: Yes = using etomidate for anesthesia induction, No = other; fentanyl: Yes = using fentanyl for anesthesia induction, No = other; cutoff: Yes = DIVCmax > 1.5cm, No = other.

Figure S4C: Meta-regression for DIVCmin.

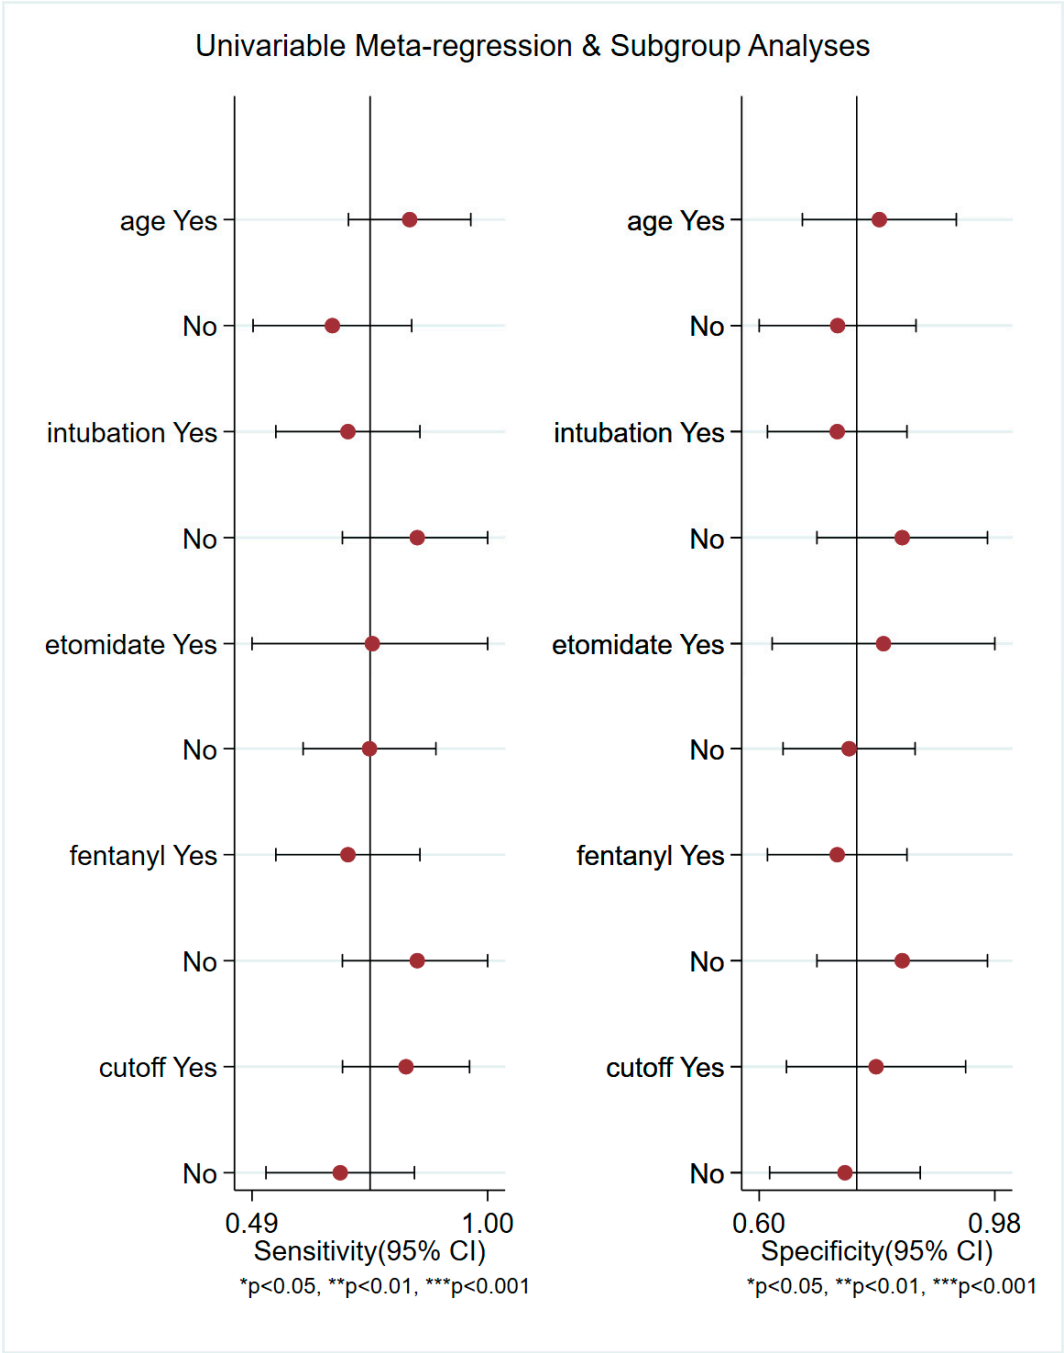

Notes: Yes = age > 60 years, No = other; etomidate: Yes = using etomidate for anesthesia induction, No = other; fentanyl: Yes = using fentanyl for anesthesia induction, No = other; cutoff: Yes = DIVCmin>0.9cm, No = other.

Figure S4D: Meta-regression for carotid artery FTc.

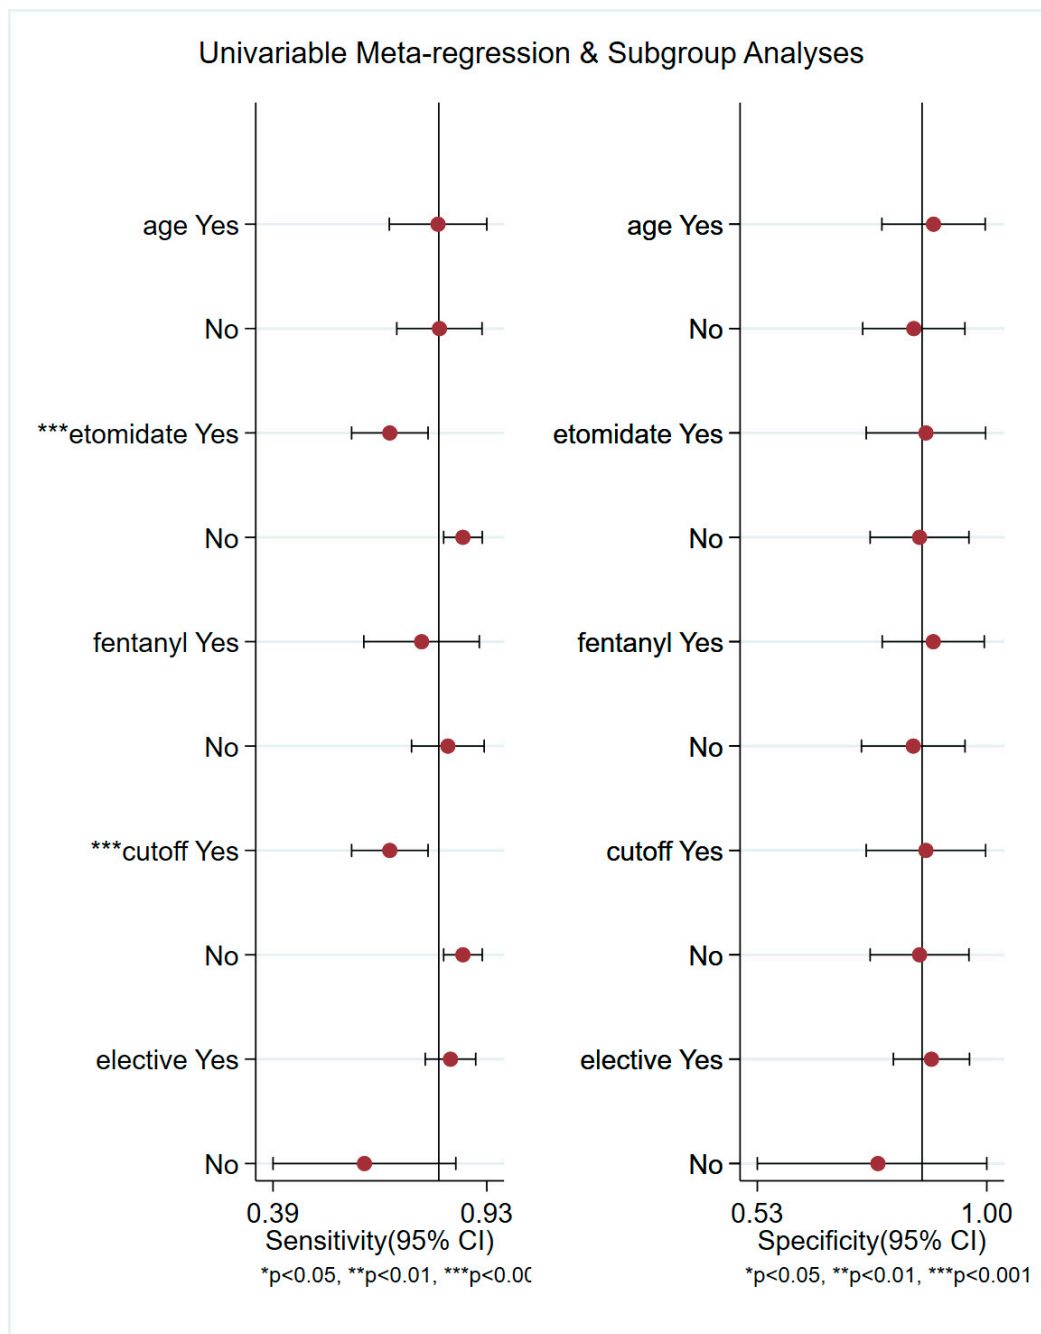

Notes: Yes = age > 60 years, No = other; etomidate: Yes = using etomidate for anesthesia induction, No = other; fentanyl: Yes = using fentanyl for anesthesia induction, No = other; cutoff: Yes = carotid artery FTc > 340ms, No = other.

Figure S5A: Deeks' funnel plot asymmetry test for publication bias of IVC-CI.

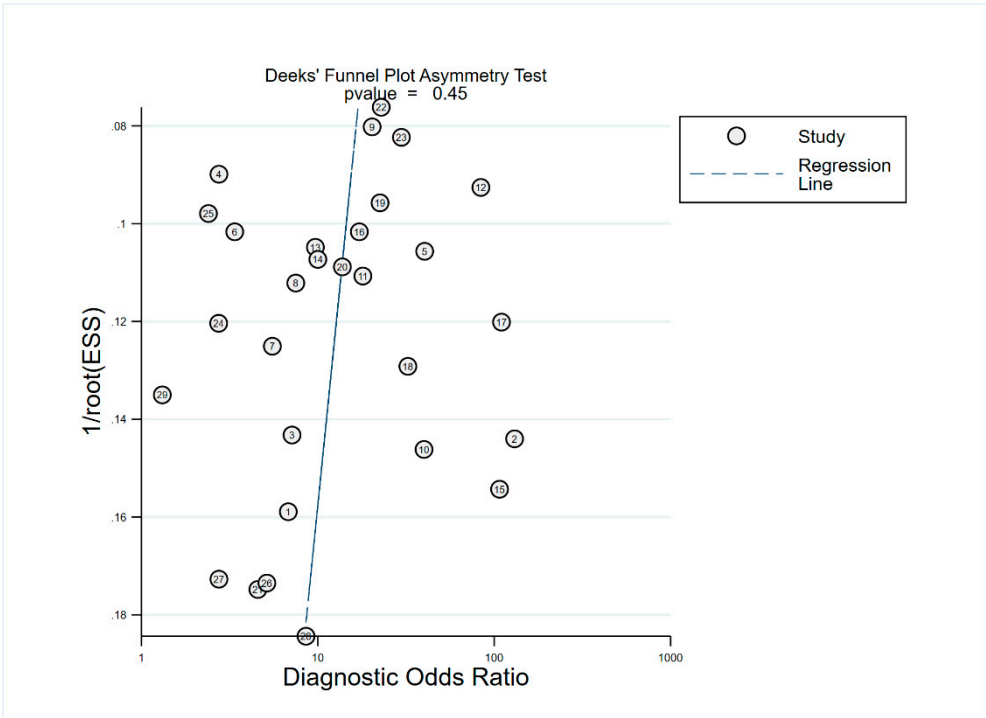

Figure S5B: Deeks' funnel plot asymmetry test for publication bias of DIVCmax.

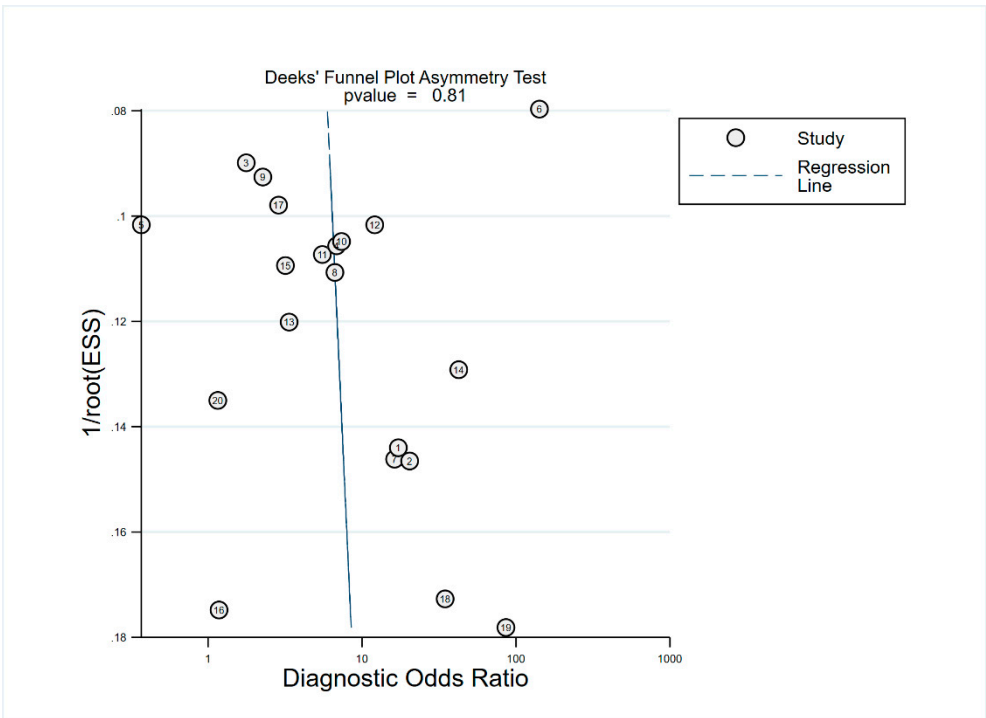

Figure S5C: Deeks' funnel plot asymmetry test for publication bias of DIVCmin.

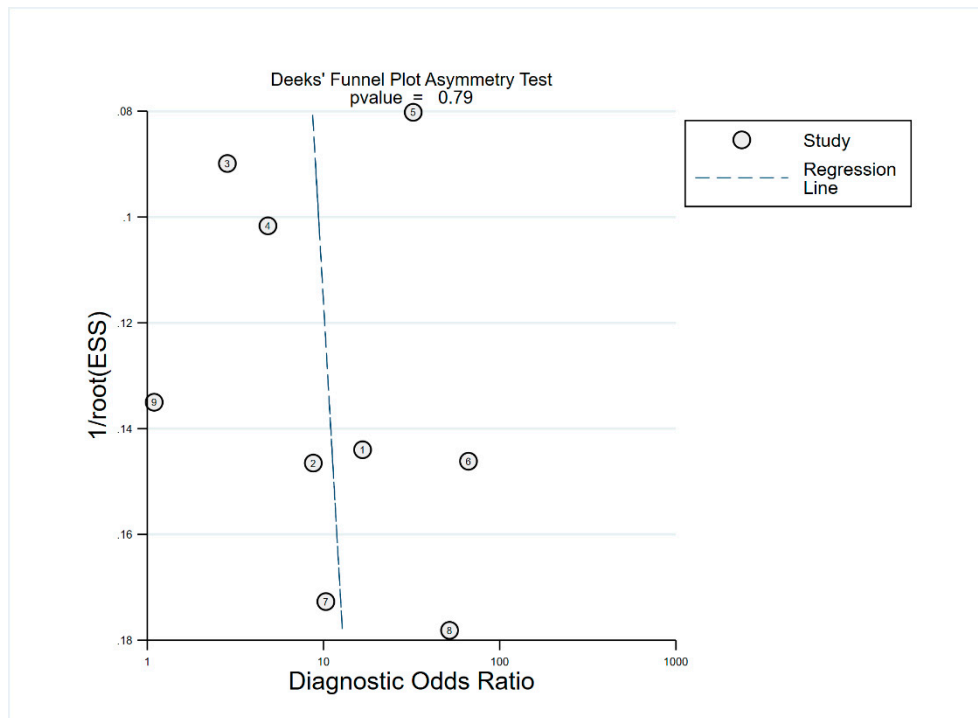

Figure S5D: Deeks' funnel plot asymmetry test for publication bias of carotid artery FTc.

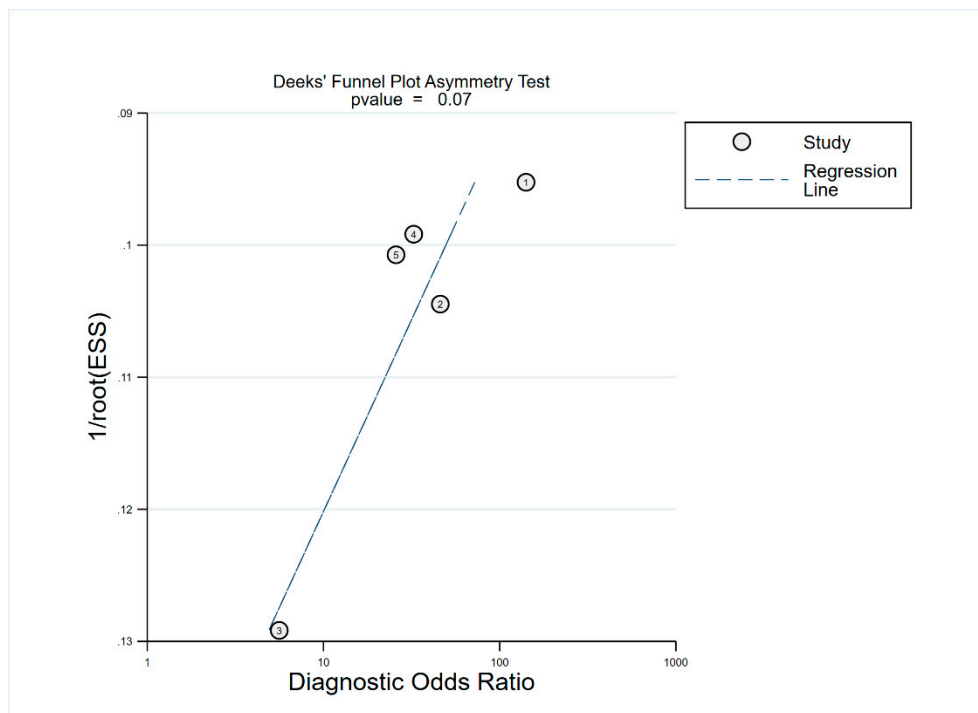

Figure S6: Assessment of Risk of Bias According to QUADAS-2.



|                             | Risk of Bias      |            |                    |                 | Applicability Concerns |            |                    |
|-----------------------------|-------------------|------------|--------------------|-----------------|------------------------|------------|--------------------|
|                             | Patient Selection | Index Test | Reference Standard | Flow and Timing | Patient Selection      | Index Test | Reference Standard |
| Agarwal J et al. 2022       | ⊖                 | +          | +                  | ?               | ⊖                      | +          | +                  |
| Aissaoui Y et al. 2022      | +                 | +          | +                  | +               | +                      | +          | +                  |
| Amin SR et al. 2022         | +                 | +          | +                  | ?               | +                      | +          | +                  |
| Au AK et al. 2016           | +                 | ?          | +                  | ?               | +                      | ?          | +                  |
| Bhimsaria SK et al. 2022    | ⊖                 | +          | +                  | +               | ⊖                      | +          | +                  |
| Cao Y et al. 2021           | +                 | +          | +                  | +               | +                      | +          | +                  |
| Cheng SS et al. 2020        | +                 | +          | +                  | +               | +                      | +          | +                  |
| Chen HJ et al. 2023         | +                 | +          | +                  | ?               | +                      | +          | +                  |
| Chowdhury AR et al. 2023    | ⊖                 | ?          | ?                  | +               | ?                      | ?          | +                  |
| Duan FY et al. 2021         | +                 | ?          | +                  | +               | +                      | +          | +                  |
| Fathy MM et al. 2023        | +                 | +          | +                  | ?               | +                      | +          | +                  |
| Goyal A et al. 2022         | +                 | +          | +                  | ?               | +                      | +          | +                  |
| He FJ et al. 2022           | +                 | +          | +                  | ?               | +                      | +          | +                  |
| Huang SS et al. 2023        | +                 | ?          | ?                  | +               | +                      | +          | ⊖                  |
| Jaya W et al. 2021          | +                 | ?          | ?                  | +               | +                      | +          | +                  |
| Khaled D et al. 2023        | ?                 | +          | +                  | ?               | ?                      | +          | +                  |
| Li GF et al. 2020           | +                 | +          | +                  | +               | +                      | +          | +                  |
| Maitra S et al. 2020        | +                 | +          | ?                  | +               | +                      | +          | +                  |
| Mohammed S et al. 2021      | +                 | ?          | ⊖                  | ?               | +                      | ?          | +                  |
| Omar H et al. 2023          | +                 | +          | +                  | ?               | +                      | +          | +                  |
| Purshothaman SS et al. 2020 | ?                 | +          | +                  | ?               | ?                      | +          | +                  |
| Qiu XS et al. 2020          | +                 | +          | +                  | +               | ?                      | +          | +                  |
| Rose N et al. 2022          | +                 | +          | ?                  | +               | +                      | +          | +                  |
| Sari S et al. 2019          | +                 | +          | +                  | +               | +                      | +          | +                  |
| Szabo M et al. 2019         | ?                 | +          | +                  | ?               | ?                      | ⊖          | +                  |
| Turoni L et al. 2022        | +                 | +          | +                  | +               | ?                      | +          | +                  |
| Wang J et al. 2022          | +                 | ?          | +                  | +               | +                      | +          | +                  |
| Xu QQ et al. 2021           | +                 | +          | +                  | ?               | +                      | +          | +                  |
| Yang YY et al. 2023         | ?                 | ?          | ?                  | +               | +                      | +          | +                  |
| Zhang HY et al. 2022        | ?                 | +          | +                  | ?               | +                      | +          | +                  |
| Zhang J et al. 2016         | +                 | +          | +                  | ?               | +                      | +          | ?                  |
| Zheng DQ et al. 2023        | +                 | +          | +                  | +               | +                      | +          | +                  |

High
 Unclear
 Low
